# Supplementary figures and images for: Actin is an evolutionarily-conserved damage-associated molecular pattern that signals tissue injury in Drosophila melanogaster
Source: eLife journal article supplement (doi:10.7554/elife.19662), 2016-11-18

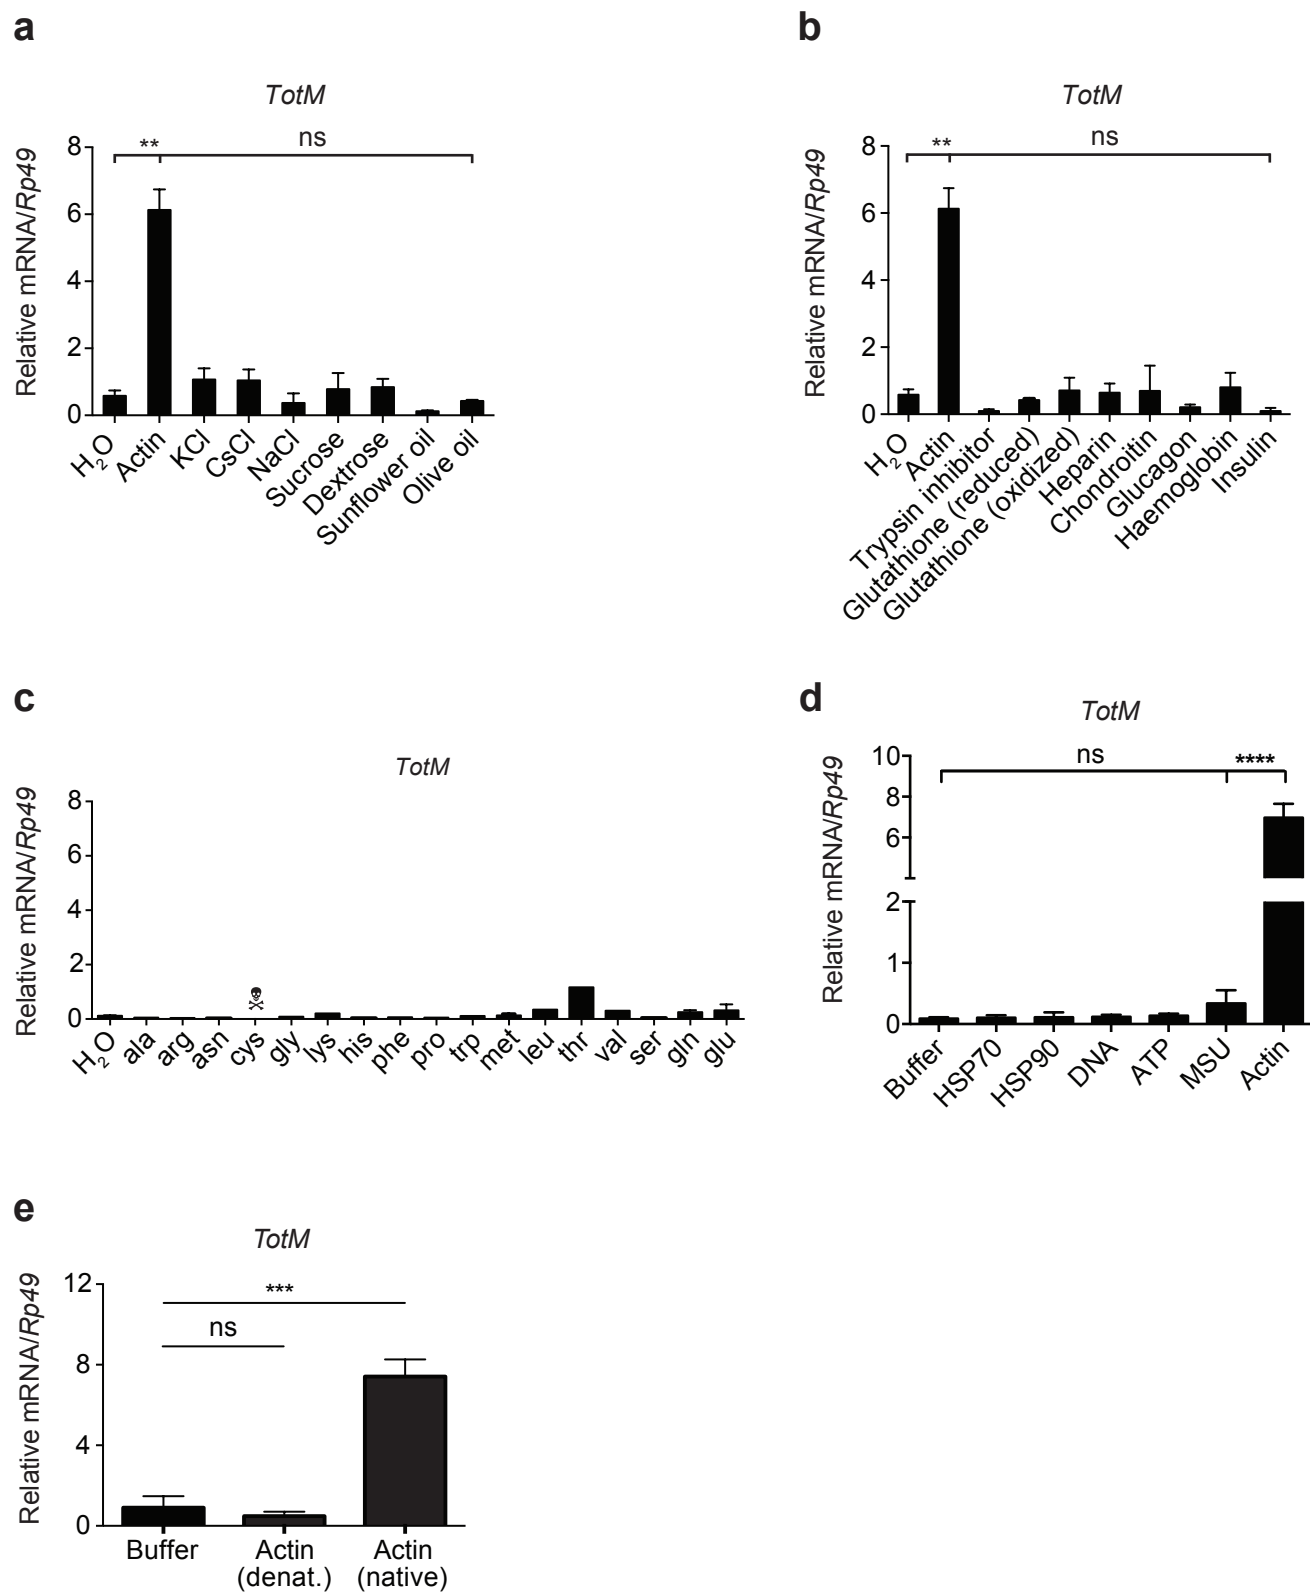

Figure 2-figure supplement 2

Supplement: supp [file elife-19662-supp-v1.zip]

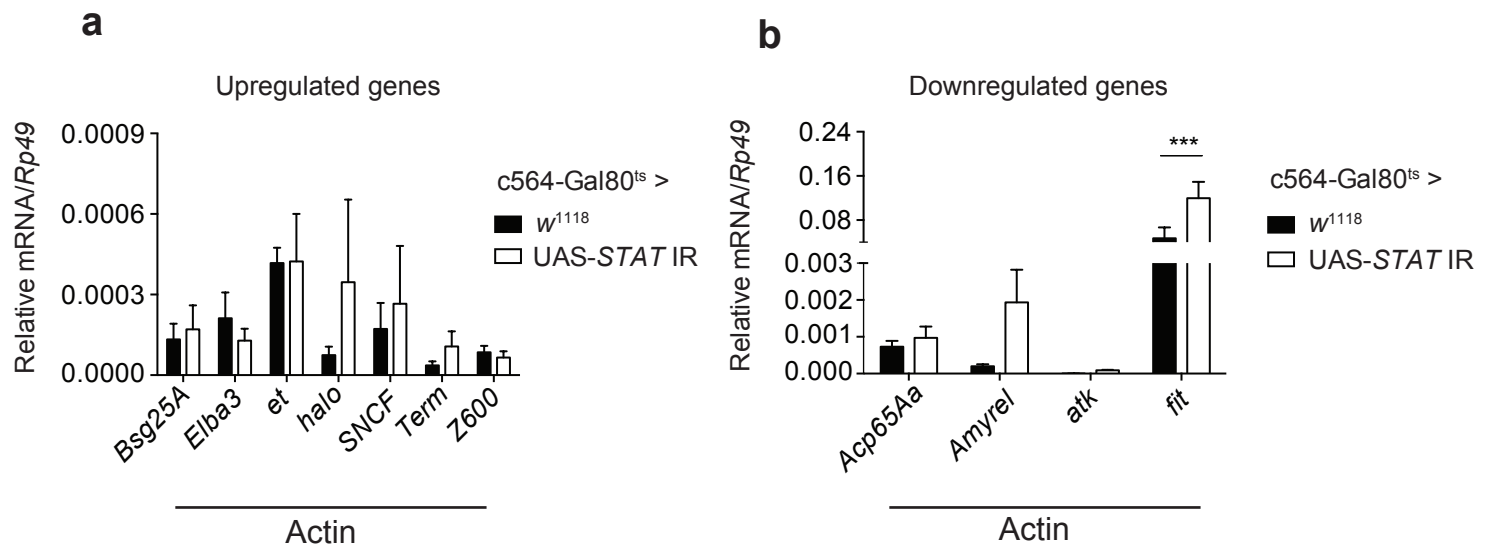

Figure 4-figure supplement 1

Supplement: supp [file elife-19662-supp-v1.zip]

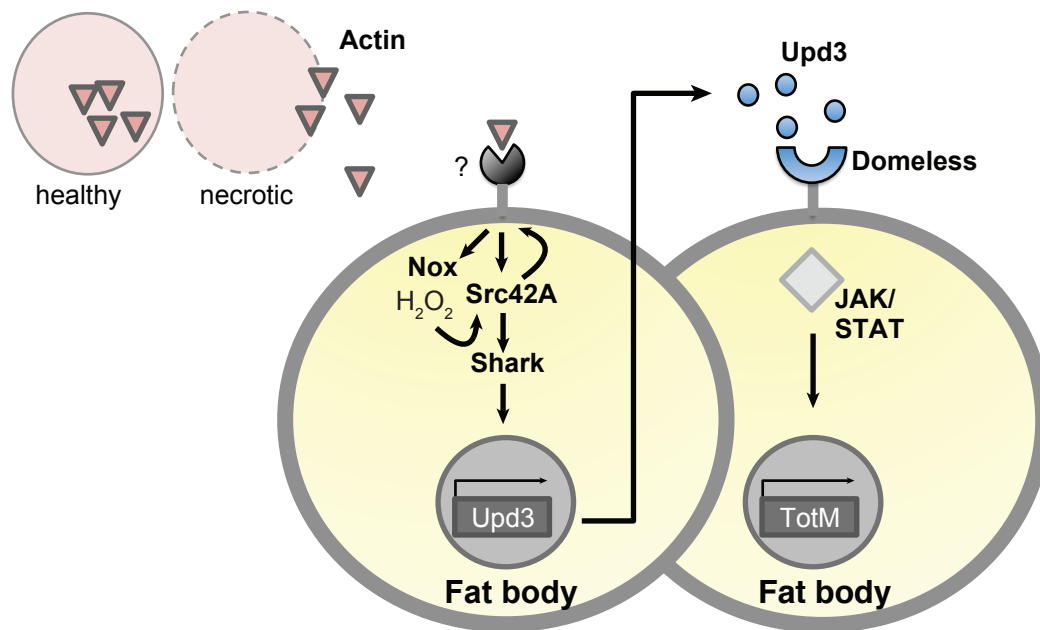

Figure 8-figure supplement 1

Supplement: supp [file elife-19662-supp-v1.zip]

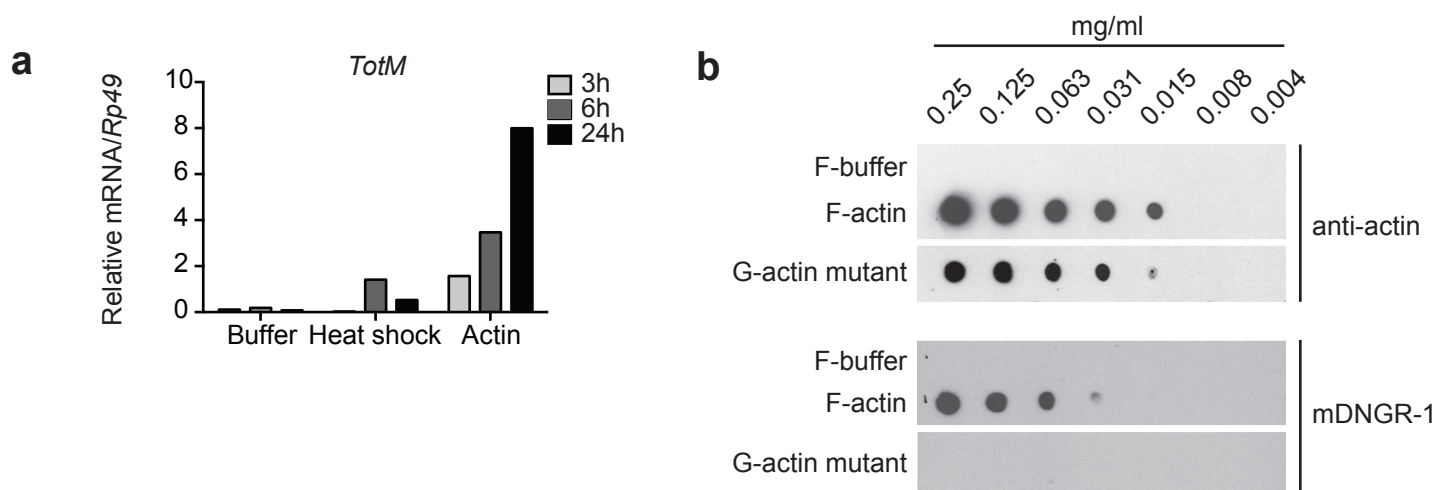

Figure 2-figure supplement 1

Supplement: supp [file elife-19662-supp-v1.zip]

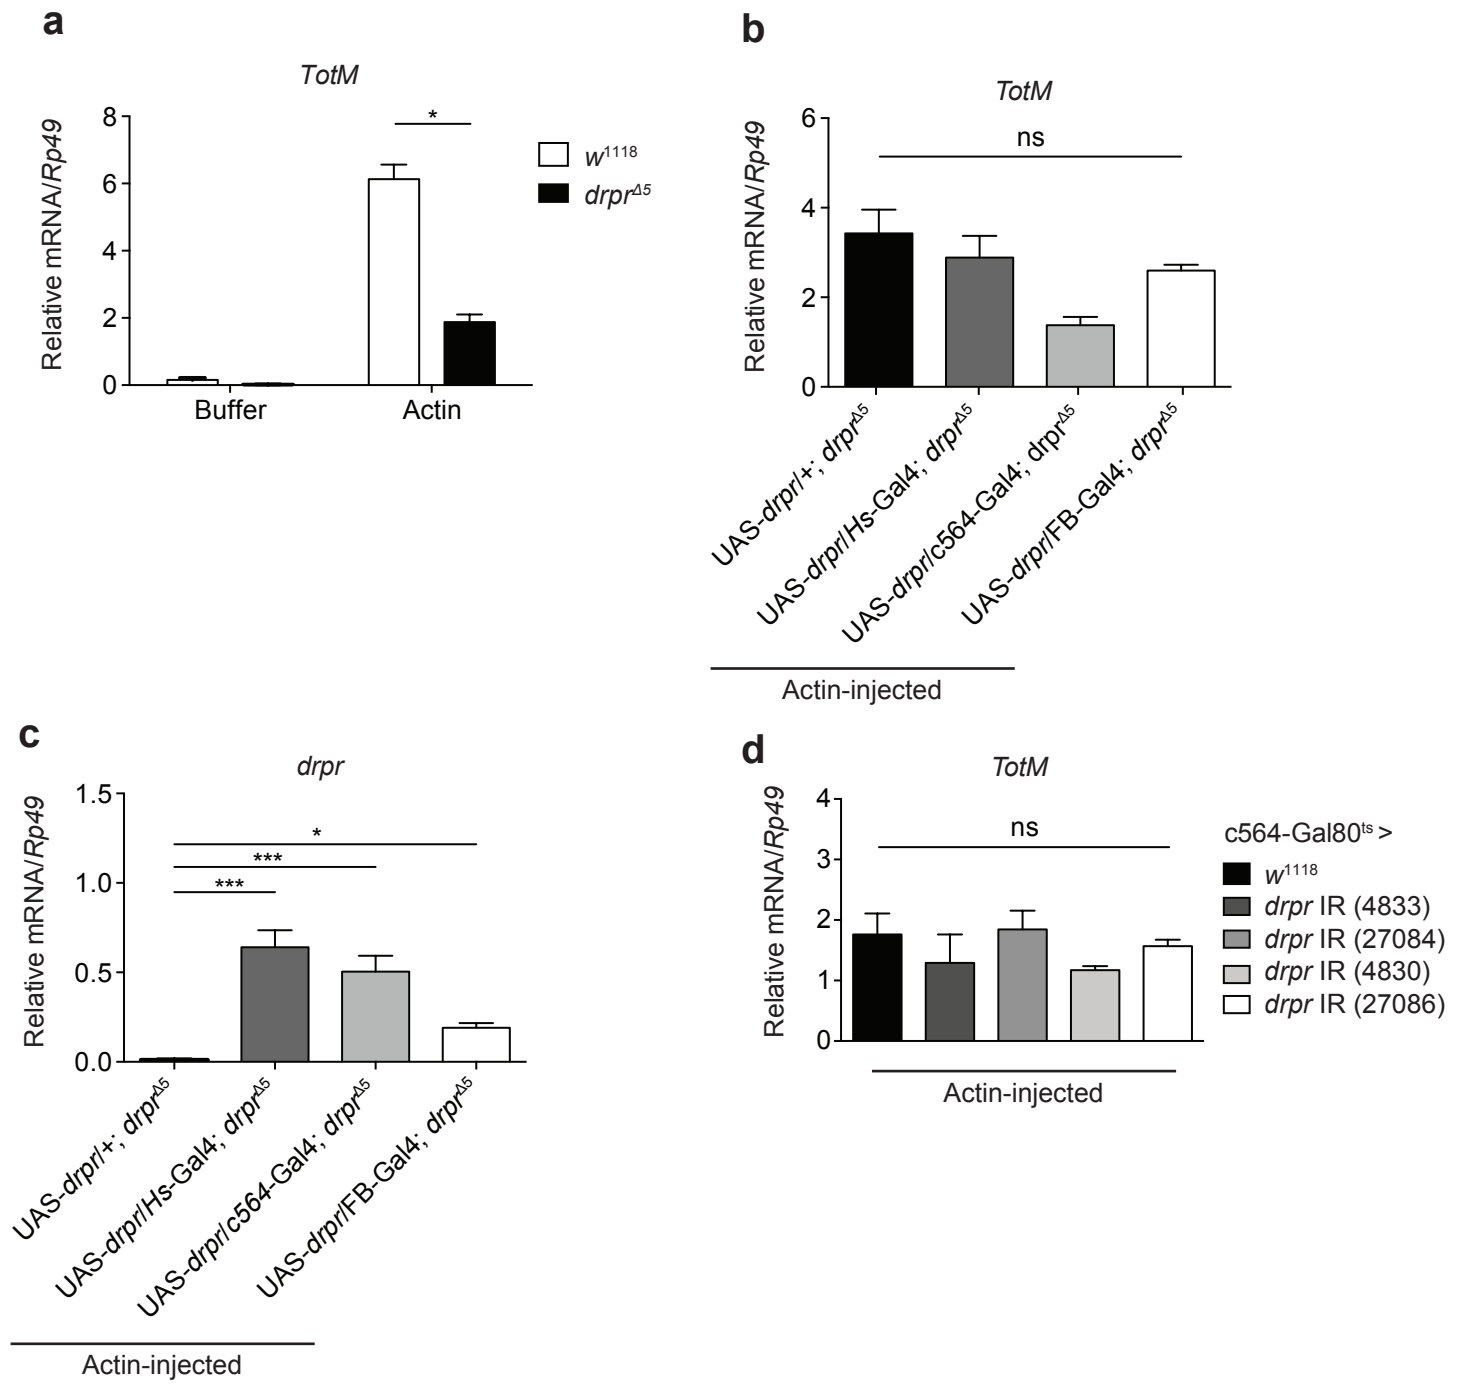

Figure 6-figure supplement 1

Supplement: supp [file elife-19662-supp-v1.zip]
